# Supplementary material
Source: PubMed Central journal article supplement (PMC3100701)

**Figure S1. Low molecular weight heparin (LMWH) potentiates platelet activation via  $\alpha$ IIB $\beta$ 3**

Similar to that observed for unfractionated heparin, LMWH (A) augments ADP-induced aggregation in solution, (B) initiates signaling via the Akt pathway and (C) supports platelet spreading in an  $\alpha$ IIB $\beta$ 3-dependent manner.

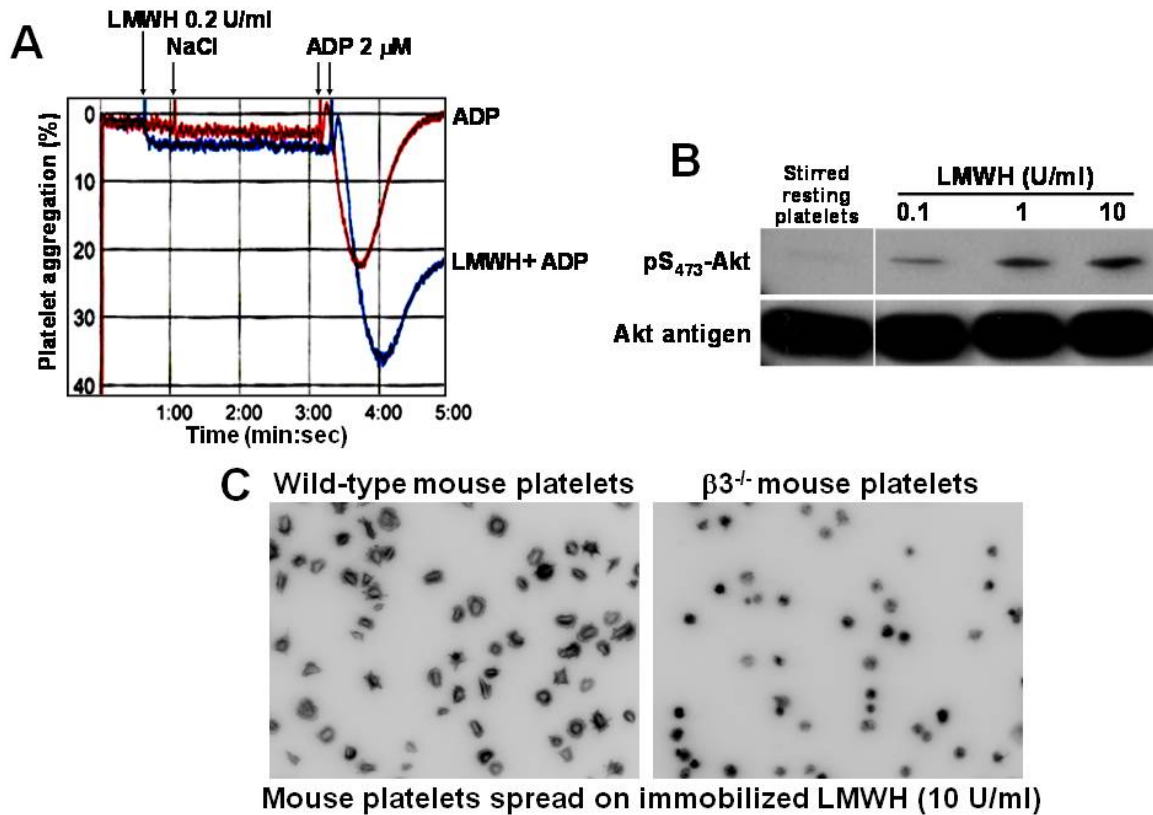

**Figure S2. Fondaparinux (Arixtra™) potentiates platelet activation via  $\alpha$ IIB $\beta$ 3**

Similar to that observed for unfractionated heparin, fondaparinux (A) augments ADP-induced aggregation in solution, (B) initiates signaling via the Akt pathway and (C) supports platelet spreading in an  $\alpha$ IIB $\beta$ 3-dependent manner that can be inhibited with the fiban eptifibatide.

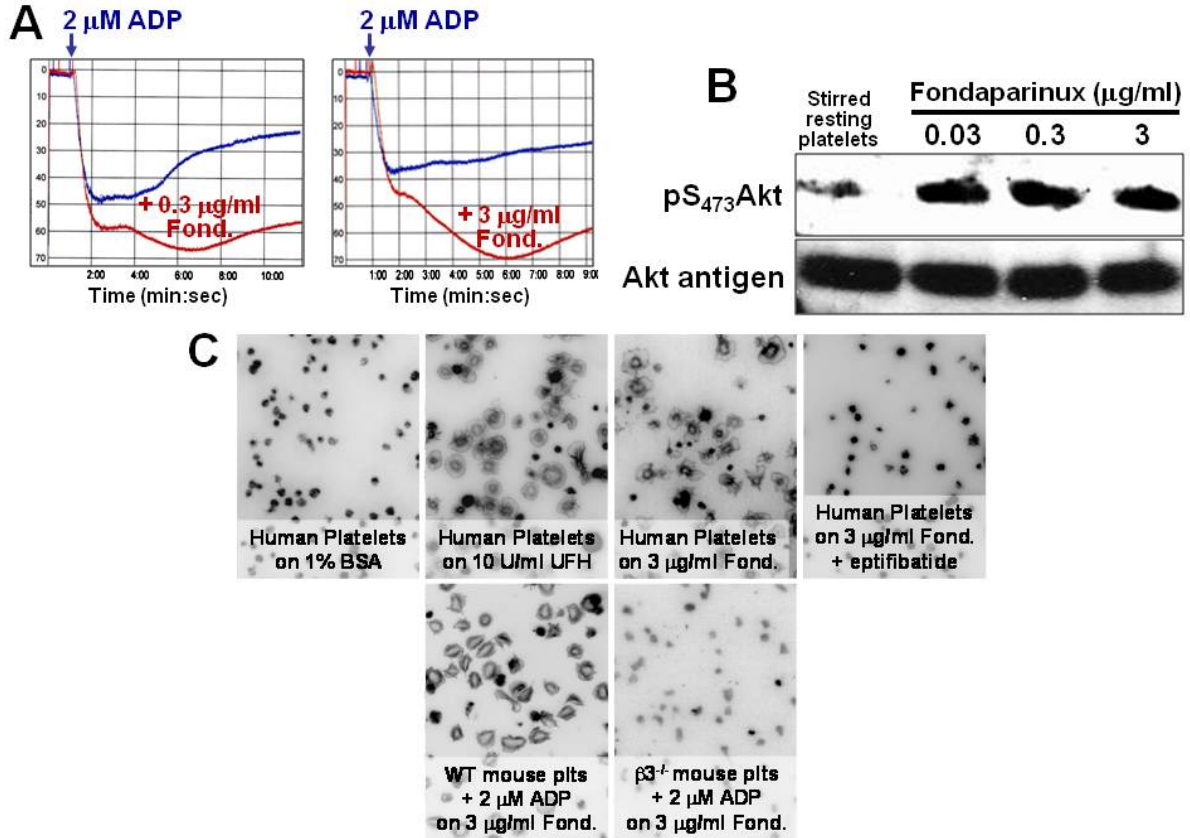

**Figure S3. Dose-dependent Akt activation by unfractionated heparin**

Washed human platelets ( $2.5 \times 10^8/\text{ml}$ ) were placed in an aggregometer cuvette at  $37^\circ\text{C}$  in the absence or presence of different doses heparin (0.1, 1, and 1 unit/ml) for 2 min, lysed in SDS sample buffer, and subjected to immunoblot analysis using the indicated antibodies. Note that heparin even at 0.1 U/ml can cause Akt phosphorylation in platelets.

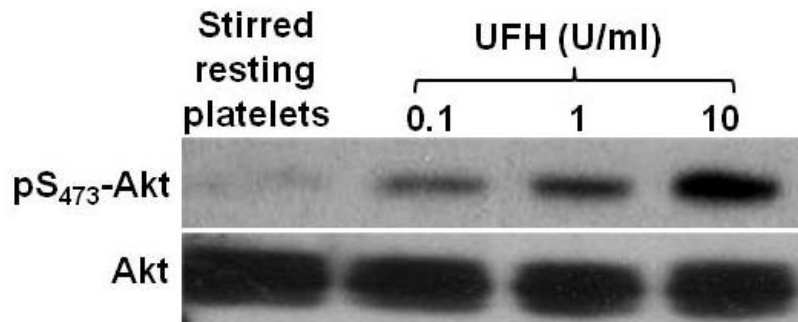

**Figure S4.  $\alpha$ IIB $\beta$ 3 receptor antagonists inhibit phosphorylation of Akt induced by platelet adhesion to immobilized heparin**

Washed human platelets were incubated with Eptifibatide (6.6  $\mu$ g/ml), abciximab (10  $\mu$ g/ml), or fab fragment of normal mouse Ig G (nFab, 10  $\mu$ g/ml) for 5 mins before being exposed to heparin (10 U/ml)-coated plates. Platelets bound to immobilized heparin for 45 minutes, or those non-adherent to BSA, were subjected to SDS-PAGE/immunoblot analysis using the indicated antibodies. Note that pretreatment of platelets with  $\alpha$ IIB $\beta$ 3 antagonists, either eptifibatide or abciximab completely blocked immobilized heparin-induced Akt phosphorylation.

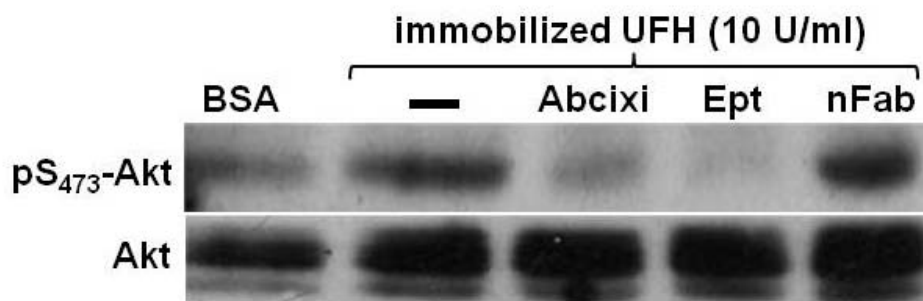

Supplement: supp_blood-2010-09-307751_Document1.pdf [file supp_blood-2010-09-307751_Document1.pdf]
